# Supplementary material for: The SMAD3 transcription factor binds complex RNA structures with high affinity
Source: PubMed Central journal article supplement (PMC5714123; doi:10.1093/nar/gkx846), 2017-09-25
Supplement: gkx846_supp.pdf [file gkx846_supp.pdf]

**Figure S1**

**A**

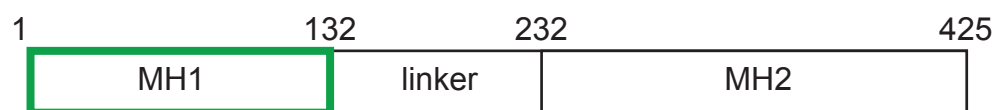

**B**

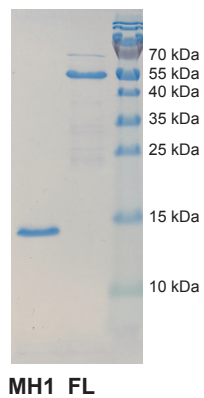

**C**

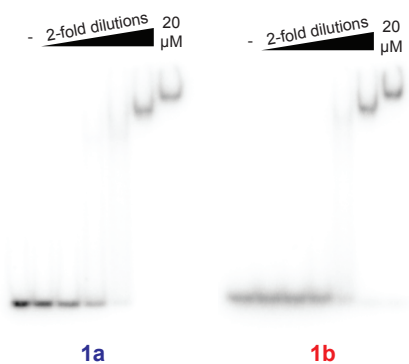

**D**

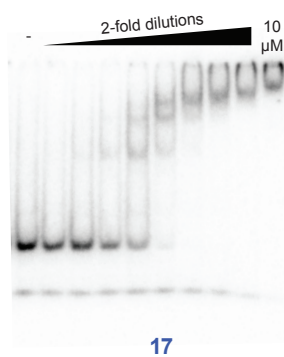

**Figure S2**

**A**

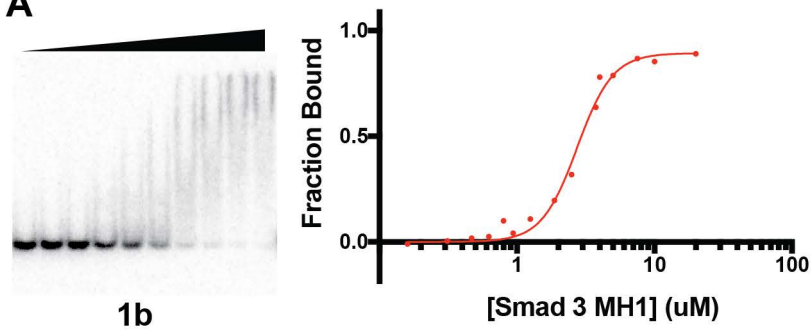

**B**

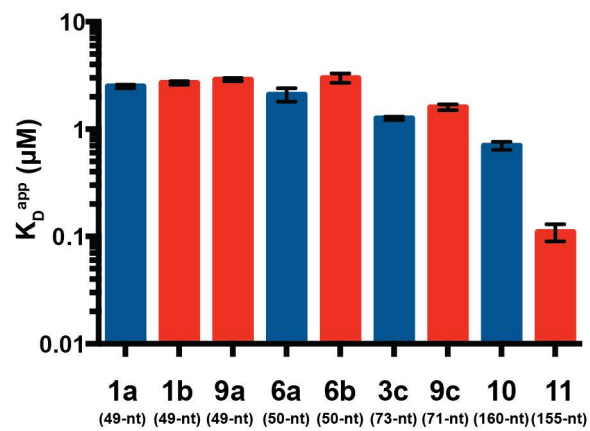

**C**

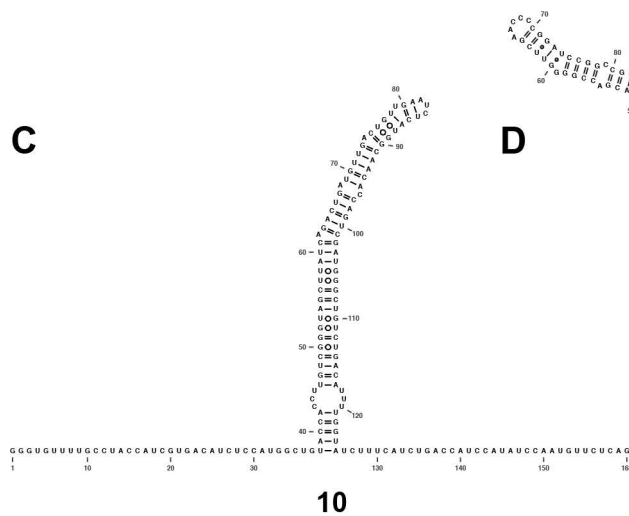

**D**

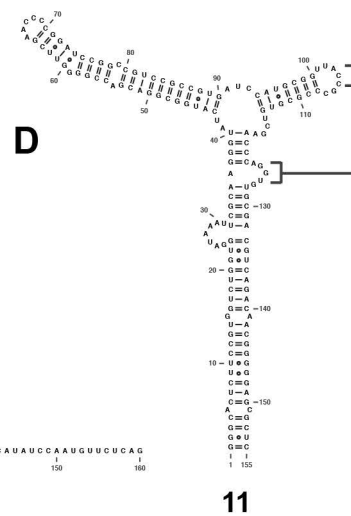

**Figure S3**

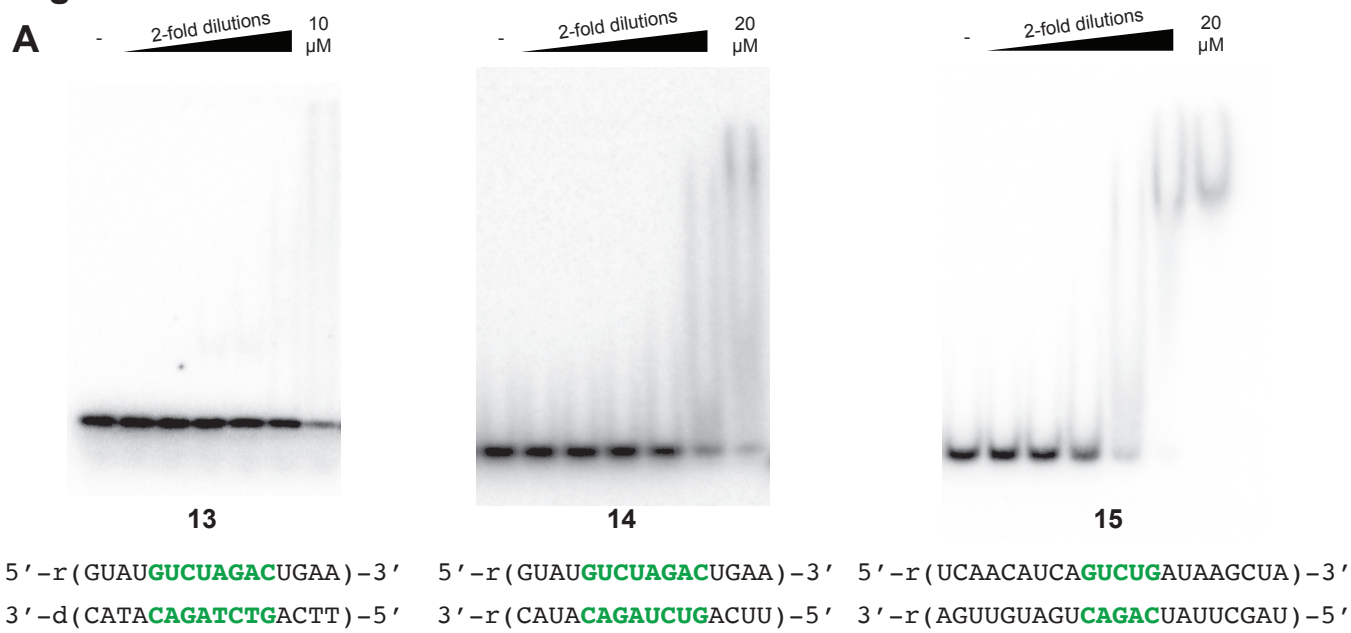

**Supplementary Table 1.** Complete list of RNA sequences used in this study

| Construct number | Template pri-miRNA                    | Sequence                                                                                                                                                                    |
|------------------|---------------------------------------|-----------------------------------------------------------------------------------------------------------------------------------------------------------------------------|
| <b>1a</b>        | hsa-miR-21 central stem               | GGACGCUUAUCAGACUGAUGUUGUUCGCAACACCAGUCGAUG<br>GGCGUCC                                                                                                                       |
| <b>1b</b>        | hsa-miR-21 central stem $\Delta$ SBE  | GGACGCUUAUAAAACUGAUGUUGUUCGCAACACCAGUUUAUG<br>GGCGUCC                                                                                                                       |
| <b>2a</b>        | hsa-miR-105 central stem              | GGACGAUGCUCAGACUCCUGUGUUCGCACGGAUGUUUGAGCA<br>UCGUCC                                                                                                                        |
| <b>3a</b>        | hsa-miR-199a1 central stem            | GGACAACCAGUGUUCAGACUACCUGUUUCGACAGUAGUCUGC<br>ACACUGGUUGUCC                                                                                                                 |
| <b>3b</b>        | hsa-miR-199a1 minimal SBE             | GGACAAUCAGACUACCUGUUUCGACAGGUAGUCUGCUUGUCC                                                                                                                                  |
| <b>3c</b>        | hsa-miR-199a1 stem loop               | GGCCAACCCAGUGUUCAGACUACCUGUUCAGGAGGCUCUCAA<br>UGUGUACAGUAGUCUGCACAUUGGUUAGGCC                                                                                               |
| <b>4a</b>        | hsa-miR-215 central stem              | GGACGAUUGACAGACAAUAUGCGUUCGCGCAGUUUGUCUGUC<br>AUUCGUCC                                                                                                                      |
| <b>4b</b>        | hsa-miR-215 natural loop              | GGACGAUUGACAGACAAUAUAGCUGAGUUUGUCUGUCAUUC<br>GUCC                                                                                                                           |
| <b>5a</b>        | hsa-miR-421 central stem              | GGACGUUAAAUGUUUGUUGAGCGUUCGCGCUCAACAGACA<br>AAUCGUCC                                                                                                                        |
| <b>6a</b>        | hsa-miR-509 central stem              | GGACGUACUGCAGACAGUGGGCGUUCGCGCGUACGUCUGUGG<br>GUACGUCC                                                                                                                      |
| <b>6b</b>        | hsa-miR-509 central stem $\Delta$ SBE | GGACGUACUGCCAGAAGUGGGCGUUCGCGCGUACUCUGGUGG<br>GUACGUCC                                                                                                                      |
| <b>7a</b>        | hsa-miR-600 natural loop              | GGACGCUCUUGUCUGUCAGGCAGUGGAGUUACUUACAGACAA<br>GAGCGUCC                                                                                                                      |
| <b>8a</b>        | hsa-miR-631 central stem              | GGACGUGGCCAGACCUCAGCUUCGGCUGAUGGACUGAGUCA<br>CGUCC                                                                                                                          |
| <b>9a</b>        | cel-miR-84 central stem               | GGACGUGAGGUAGUAUGUAAGCGUUCGCGCUUUAACUAACU<br>CGCGUCC                                                                                                                        |
| <b>9b</b>        | cel-miR-84 short                      | GGUGAGGUAGUAUGUAAGCUUCGGCUUUAACUAACUCGCC                                                                                                                                    |
| <b>9c</b>        | cel-miR-84 stem loop                  | GGCAUCUGAGGUAGUAUGUAAUAUUGUAGACUGUCUAUAAU<br>GUCCACAAUGUUUAACUAACUCGGCUGCC                                                                                                  |
| <b>10</b>        | hsa-miR-21 extended                   | GGGUGUUUUGCCUACCAUCGUGACAUCUCCAUGGCUGUACCA<br>CCUUGUCGGGUAGCUUAUCAGACUGAUGUUGACUGUUGAAU<br>CUCAUGGCAACACCAGUCGAUGGGCUGUCUGACAUUUUGGUA<br>UCUUUCAUCUGACCAUCCAUAUCCAUGUUCUCAG |
| <b>11</b>        | VAI                                   | GGGCACUCUCCGUGGUCUGGUGGAUAAAUCGCAAGGGUA<br>UCAUGGCGGACGACCGGGUUCGAACCCCGGAUCCGGCCGUCC<br>GCCGUGAUCCAUGCGGUUACCGCCCGGUGUCGAACCCAGGU<br>GUGCGACGUCAGACAACGGGGGAGCGCUC         |



### **Supplementary Figure 1**

**SMAD3 RNA binding is conferred by the MH1 domain.** **A)** SMAD3 domain map with the nucleic acid-binding MH1 domain highlighted in green. **B)** SDS-PAGE gel of the purified protein constructs used for all experiments. **C)** Representative EMSAs of full-length SMAD3 binding to pri-miRNA constructs with and without the SBE. This binding recapitulates the affinity and the lack of sequence specificity conferred by SMAD3 MH1. **D)** Representative EMSA of full-length SMAD3 binding to **17**. This binding recapitulates the high affinity for complex RNA structures conferred by SMAD3 MH1.

### **Supplementary Figure 2**

**SMAD3 does not preferentially bind pri-miRNA stem loops.** **A)** Representative EMSAs and curve fits for replicate experiments performed on pri-miRNA constructs **B)**  $K_D^{app}$  values calculated from replicate experiments on pri-miRNA constructs. pri-miRNA constructs containing putative SBEs are shown in blue and negative controls are shown in red. **C)** Secondary structure of the miRNA construct **10** containing the central stem loop and flanking single-stranded regions. RNA folding algorithms predict a stable central stem and many unstable conformations for the flanking regions. **D)** Secondary structure of the length matched control RNA construct **11**. The secondary structure is based on experimental probing data (51).

### **Supplementary Figure 3**

**SMAD3 does not bind dsRNA or RNA/DNA hybrid duplexes.** Representative EMSAs of poor SMAD3 binding to RNA-containing duplexes.

### **Supplementary Table 1**

**Complete list of RNA sequences used in this study**
